# Supplementary material for: Psychodynamic Therapy: As Efficacious as Other Empirically Supported Treatments? A Meta-Analysis Testing Equivalence of Outcomes
Source: Atypon-hosted journal article supplement (doi:10.1176/appi.ajp.2017.17010057), 2017-05-25
Supplement: appi.ajp.2017.17010057.ds001.pdf [file appi.ajp.2017.17010057.ds001.pdf]

Data supplement for Steinert et al., Psychodynamic Therapy: As Efficacious as Other Empiracally Supported Treatments? A Meta-Analysis Testing Equivalence of Outcomes. Am J Psychiatry (doi:10.1176/appi.ajp.2017.17010057)

## **Supplementary web appendix**

### **Psychodynamic therapy: as efficacious as other empirically supported treatments? - A meta-analysis testing equivalence of outcomes**

Christiane Steinert, Thomas Munder, Sven Rabung, Jürgen Hoyer, Falk Leichsenring

#### Contents:

- eAppendix A Equivalence testing
- eAppendix B Complete references of included studies
- eAppendix C Details of electronic and manual searches
- eAppendix D Flow-chart: selection process of studies
- eAppendix E Multilevel Allegiance Rating Scale (MARS)
- eAppendix F Assignment of outcome measures to categories of outcome for each study

## eAppendix A: Equivalence testing

For testing equivalence of outcomes, small differences in effect sizes that are compatible with equivalence must be detectable with a sufficient power. Thus, large sample sizes are required (1). In psychotherapy research, not even one individual study seems to exist that is sufficiently powered ( $\geq 80\%$ ) to demonstrate equivalence or non-inferiority if a small margin of  $d=0.25$  (standardized difference in means) is defined as compatible with equivalence or non-inferiority (1, 2). For a margin of  $d=0.25$ , 2 x 275 patients are required to demonstrate equivalence (2 x 253 for demonstrating non-inferiority) (1). If a slightly larger margin of 0.30 is used, a few studies exist that were sufficiently powered for demonstrating equivalence or non-inferiority (Table 1). For a margin of 0.40 a few more studies exist (Table 1), and again some more studies, if an effect size below 0.50 (i.e.  $\leq 0.49$ ) is used (Table 1). - 0.50 is regarded as a medium effect size. A recent study found more than 100 trials directly comparing two or more forms of psychotherapy in depression, but the largest trial was only sufficiently powered to detect a between-group effect size of  $d=0.42$  (2).

Testing for equivalence deviates in several important aspects from the more usual superiority testing (3). Most importantly, a margin of equivalence  $[\delta]$  has to be defined a priori specifying the maximum difference in outcomes that would still be compatible with equivalence (3, 4). Furthermore, two one-sided tests (TOST) are required instead of the traditional two-sided test in superiority testing. By using TOST, equivalence is established at the  $\alpha$  significance level, if a  $(1-2\alpha)\times 100\%$  equivalence confidence interval for the difference in efficacy is included within the equivalence interval  $[-\delta, \delta]$  (3): "The reason the confidence interval is  $(1-2\alpha)\times 100\%$  and not the usual  $(1-\alpha)\times 100\%$  is because this method is tantamount to performing two one-sided tests. Thus, using a 90% equivalence confidence interval yields a 0.05 significance level for testing equivalence" (3, p. 193). As the hypothesis challenged by the TOST procedure refers to equality, not to a difference, the null and alternative hypothesis of the traditional two-sided test are reversed (3):

$$H1: -\Delta E \leq \Delta \leq \Delta E$$

$$H0: \Delta > \Delta E \text{ or } \Delta < -\Delta E.$$

In equivalence testing, two p-values can be determined via the equivalence z (e.g. for a margin of 0.25):  $z_1=(\text{effect size}+0.25)/\text{standard error}$ ,  $z_2=(\text{effect size}-0.25)/\text{standard error}$ , the larger of the two p-values is displayed (5). The null hypothesis of non-equivalence is rejected and equivalence can be concluded, if the p-value indicates significance – which is equivalent to the 90% confidence interval being completely included in the equivalence interval.

Equivalence testing has not yet been widely implemented in mental health research (6). Usually superiority trials finding "no significant differences" between treatments claim to have shown equivalence, yet when compared directly, the traditional two-sided test and the TOST procedure often yield diverging results (7). Thus, equivalence cannot definitely be concluded from the traditional two-sided test.

### References to eAppendix A

1. Leichsenring F, Luyten P, Hilsenroth MJ, et al. Psychodynamic Therapy Meets Evidence-Based Medicine: A Systematic Review Using Updated Criteria. *Lancet Psychiatry*. 2015;2:648-660.
2. Cuijpers P. Are all psychotherapies equally effective in the treatment of adult depression? The lack of statistical power of comparative outcome studies. *Evid Based Ment Health*. 2016;19(2):39-42.
3. Walker E, Nowacki AS. Understanding equivalence and noninferiority testing. *J Gen Intern Med*. 2011;26(2):192-196.
4. Piaggio G, Elbourne DR, Pocock SJ, Evans SJ, Altman DG. Reporting of noninferiority and equivalence randomized trials: extension of the CONSORT 2010 statement. *JAMA*. 2012;308(24):2594-2604.
5. Rogers JL, Howard KI, Vessey JT. Using significance tests to evaluate equivalence between two experimental groups. *Psychol Bull*. 1993;113(3):553-565.
6. Ioannidis JP. Meta-research: The art of getting it wrong. *Res Synth Methods*. 2010;1(3-4):169-184.
7. Barker LE, Luman ET, McCauley MM, Chu SY. Assessing equivalence: an alternative to the use of difference tests for measuring disparities in vaccination coverage. *Am J Epidemiol*. 2002;156(11):1056-1061.

## eAppendix B: Complete references of included studies

---

### Major depressive disorder

---

1. Barber, J., Barrett, M., Gallop, R., Rynn, M., & Rickels, K. (2012). Short-term dynamic psychotherapy versus pharmacotherapy for major depressive disorder: a randomized, placebo-controlled trial. *Journal of Clinical Psychiatry, 73*, 66-73.
2. Connolly Gibbons, M. B., Gallop, R., Thompson, D., Luther, D., Crits-Christoph, K., Jacobs, J., . . . Crits-Christoph, P. (2016). Comparative Effectiveness of Cognitive Therapy and Dynamic Psychotherapy for Major Depressive Disorder in a Community Mental Health Setting: A Randomized Clinical Noninferiority Trial. *JAMA Psychiatry, 73*, 904-911
3. Cooper, P. J., Murray, L., Wilson, A., & Romaniuk, H. (2003). Controlled trial of the short- and long-term effect of psychological treatment of post-partum depression. I. Impact on maternal mood. *British Journal of Psychiatry, 182*, 412-419.
4. Driessen, E., Van, H. L., Don, F. J., Peen, J., Kool, S., Westra, D., . . . Dekker, J. J. (2013). The efficacy of cognitive-behavioural therapy and psychodynamic therapy in the outpatient treatment of major depression: a randomized clinical trial. *American Journal of Psychiatry, 170*, 1041-1050.
5. Gallagher-Thompson, D. E., & Steffen, A. M. (1994). Comparative effects of cognitive-behavioral and brief psychodynamic psychotherapies for depressed family caregivers. *Journal of Consulting and Clinical Psychology, 62*, 543-549.
6. Salminen, J. K., Karlsson, H., Hietala, J., J, K., Aalto, S., Markkula, J., . . . Toikka, T. (2008). Short-term psychodynamic psychotherapy and fluoxetine in major depressive disorder: a randomized comparative study. *Psychotherapy and Psychosomatics, 77*, 351-357.  
**Follow-up:** Kronström, K., Salminen, J.K., Hietala, J., Kajander, J., Vahlberg, T., Markkula, J., Rasi-Hakala, H., Karlsson, H., 2009. Does defense style or psychological mindedness predict treatment response in major depression? *Depression and Anxiety, 26*, 689-695.
7. Shapiro, D. A., Barkham, M., Rees, A., Hardy, G. E., Reynolds, S., & Startup, M. (1994). Effects of treatment duration and severity of depression on the effectiveness of cognitive-behavioral and psychodynamic-interpersonal psychotherapy. *Journal of Consulting and Clinical Psychology, 62*, 522-534.
8. Thompson, L. W., Gallagher, D., & Breckenridge, J. S. (1987). Comparative effectiveness of psychotherapies for depressed elders. *Journal of Consulting and Clinical Psychology, 55*, 385-390.  
**Follow-up:** Gallagher-Thompson, D. E., Hanley-Peterson, P., & Thompson, L. W. (1990). Maintenance of gains versus relapse following brief psychotherapy for depression. *Journal of Consulting and Clinical Psychology, 58*, 371-374.

---

### Social anxiety disorder

---

9. Bögels, S. M., Wijts, P., Oort, F. J., & Sallaerts, S. J. (2014). Psychodynamic psychotherapy versus cognitive behavior therapy for social anxiety disorder: an efficacy and partial effectiveness trial. *Depression and Anxiety, 31*, 363-373.
10. Leichsenring, F., Salzer, S., Beutel, M. E., Herpertz, S., Hiller, W., Hoyer, J., . . . Leibing, E. (2013). Psychodynamic therapy and cognitive therapy in social anxiety disorder - a multi-center randomized controlled trial. *American Journal of Psychiatry, 170*, 759-767.  
**Follow-up:** Leichsenring, F., Salzer, S., Beutel, M. E., Herpertz, S., Hiller, W., Hoyer, J., . . . Leibing, E. (2014). Long-term outcome of psychodynamic therapy and cognitive-behavioral therapy in social anxiety disorder. *American Journal of Psychiatry, 171*, 1074-1082.

---

### Generalized anxiety disorder

---

11. Leichsenring, F., Salzer, S., Jager, U., Kächele, U., Kreische, R., Leweke, F., . . . Leibing, E. (2009). Short-term psychodynamic psychotherapy and cognitive-behavioral therapy in generalized anxiety disorder: a randomized controlled trial *American Journal of Psychiatry, 166*, 875-881.  
**Follow-up:** Salzer, S., Winkelbach, C., Leweke, F., Leibing, E., Leichsenring, F., 2011. Long-term effects of short-term psychodynamic psychotherapy and cognitive-behavioural therapy in generalized anxiety disorder: 12-month follow-up. *Can. J. Psychiatry, 56*, 503-508.

---

### Panic Disorder

---

12. Milrod, B., Chambless, D. L., Gallop, R., Busch, F. N., Schwalberg, M., McCarthy, K. S., . . . Barber, J. P. (2015). Psychotherapies for panic disorder: a tale of two sites. *Journal of Clinical Psychiatry, 77*, 927-935.

---

### Posttraumatic stress disorder

---

13. Brom, D., Kleber, R. J., & Defares, P. B. (1989). Brief psychotherapy for posttraumatic stress disorders. *Journal of Consulting and Clinical Psychology, 57*, 607-612.
-

---

### **Bulimia nervosa**

---

14. Garner, D. M., Rockert, W., Davis, R., Garner, M. V., Olmsted, M. P., & Eagle, M. (1993). Comparison of cognitive-behavioral and supportive-expressive therapy for bulimia nervosa. *American Journal of Psychiatry*, 150, 37-46.
15. Poulsen, S., Lunn, S., Daniel, S. I., Folke, S., Mathiesen, B. B., Katznelson, H., & Fairburn, C. G. (2014). A randomized controlled trial of psychoanalytic psychotherapy or cognitive-behavioral therapy for bulimia nervosa. *American Journal of Psychiatry*, 171, 109-116.
- 

### **Binge eating disorder**

---

16. Tasca, G. A., Ritchie, K., Conrad, G., Balfour, L., Gayrton, J., Lybanon, V., & Bissada, H. (2006). Attachment scales predict outcome in a randomized clinical trial of group psychotherapy for binge eating disorder: An aptitude by treatment interaction. *Psychotherapy Research*, 16, 106-121.
- 

### **Anorexia nervosa**

---

17. Zipfel, S., Wild, B., Groß, G., Friederich, H.-C., Teufel, M., Schellberg, D., & Herzog, W. (2013). Focal psychodynamic therapy, cognitive behaviour therapy, and optimised treatment as usual in outpatients with anorexia nervosa (antop study): Randomised controlled trial. *Lancet*, 383, 127-137.
- 

### **Opiate addiction**

---

18. Woody, G. E., Luborsky, L., McLellan, A. T., O'Brien, C. P., Beck, A. T., Blaine, A., . . . Hole, A. (1983). Psychotherapy for opiate addicts: Does it help? *Archives of General Psychiatry*, 40, 639-645.
- Follow-up:** Woody, G.E., McLellan, A.T., Luborsky, L., O'Brien, C.P., 1987. Twelve-month follow-up of psychotherapy for opiate dependence. *Am. J. Psychiatry* 144, 590-596.
- Woody, G. E., Luborsky, L., McLellan, A. T., & O'Brien, C. P. (1990). Corrections and revised analyses for psychotherapy in methadone maintenance patients. *Archives of General Psychiatry*, 47, 788-789.
- 

### **Cocaine dependence**

---

19. Crits-Christoph, P., Siqueland, L., Blaine, J., Frank, A., Luborsky, L., Onken, L. S., . . . Beck, A. T. (1999). Psychosocial treatments for cocaine dependence: National Institute on Drug Abuse Collaborative Cocaine Treatment Study. *Archives of General Psychiatry*, 56, 493-502.
- Follow-up:** Crits-Christoph, P., Siqueland, L., McCalmont, E., Weiss, R. D., Gastfriend, D. R., Frank, A., . . . Thase, M. E. (2001). Impact of psychosocial treatments on associated problems of cocaine-dependent patients. *Journal of Consulting and Clinical Psychology*, 69, 825-830.
- 

### **Borderline personality disorder**

---

20. Clarkin, J. F., Levy, K. N., Lenzenweger, M. F., & Kernberg, O. F. (2007). Evaluating three treatments for borderline personality disorder: a multiwave study. *American Journal of Psychiatry*, 164, 922-928.
- Additional outcomes:** Levy, K. N., Meehan, K. B., Kelly, K. M., Reynoso, J. S., Weber, M., Clarkin, J. F., & Kernberg, O. F. (2006). Change in attachment patterns and reflective function in a randomized control trial of transference-focused psychotherapy for borderline personality disorder. *Journal of Consulting and Clinical Psychology*, 74, 1027-1040.
- 

### **Cluster C personality disorders**

---

21. Muran, J. C., Safran, J. D., Samstag, L. W., & Winston, A. (2005). Evaluating an alliance-focused treatment for personality disorders. *Psychotherapy*, 42, 532-545.
22. Svartberg, M., Stiles, T., & Seltzer, M. H. (2004). Randomized, controlled trial of the effectiveness of short-term dynamic psychotherapy and cognitive therapy for Cluster C personality disorders. *American Journal of Psychiatry*, 161, 810-817.
- 

### **Avoidant personality disorder**

---

23. Emmelkamp, P., Benner, A., Kuipers, A., Feiertag, G., Koster, H. C., & van Appeldorn, F. J. (2006). Comparison of brief dynamic and cognitive-behavioral therapies in avoidant personality disorder. *British Journal of Psychiatry*, 189, 60-64.
-

## eAppendix C: Details of electronic and manual searches

### i) Main electronic search carried out on March 23<sup>rd</sup> 2016

|                                                                                                                                                                                                                                                                                                                                                    | PUBMED | PsycINFO | CENTRAL |
|----------------------------------------------------------------------------------------------------------------------------------------------------------------------------------------------------------------------------------------------------------------------------------------------------------------------------------------------------|--------|----------|---------|
| (((((psychodynamic* or dynamic* or psychoanalytic* or interpretive or expressive or STPP or LTPP)) AND (therapy or therapies or psychotherap* or treatment* or counseling)) AND (study or studies or trial*)) AND (outcome* or result or results or effect* or change*)) AND (psychiat* or mental* or psychol*)) AND (RCT* or compar* or randomi*) | 2205   | 1657     | 1097    |
| Total hits                                                                                                                                                                                                                                                                                                                                         |        | 4959     |         |
| Duplicates                                                                                                                                                                                                                                                                                                                                         |        | 1084     |         |
| Hits searched                                                                                                                                                                                                                                                                                                                                      |        | 3875     |         |

### ii) Manual searches in the following publications:

Abbass AA, Hancock JT, Henderson J, Kisely S. Short-term psychodynamic psychotherapies for common mental disorders. *Cochrane Database Syst Rev.* 2006:CD004687.

Barber JP, Muran JC, McCarthy KS, Keefe JR. Research on psychodynamic therapies. In: Lambert MJ, ed. *Bergin and Garfield's Handbook of Psychotherapy and Behavior Change* (6th ed). NY: Wiley;2013:443-494.

Driessen E, Cuijpers P, deMaat SCM, Abbass A, deJonghe F, Dekker JJM. The efficacy of short-term psychodynamic psychotherapy for depression. A meta-analysis. *Clin Psychol Rev.* 2010;30:25-36.

Driessen E, Hegelmaier LM, Abbass AA, et al. The efficacy of short-term psychodynamic psychotherapy for depression: A meta-analysis update. *Clin Psychol Rev.* 2015;42:1-15.

Leichsenring F, Leweke F, Klein S, Steinert C. The Empirical Status of Psychodynamic Psychotherapy - An Update: Bambi's Alive and Kicking. *Psychother Psychosom.* 2015;84:129-148.

Leichsenring F, Luyten P, Hilsenroth MJ, et al. Psychodynamic Therapy Meets Evidence-Based Medicine: A Systematic Review Using Updated Criteria. *Lancet Psychiatry.* 2015;2:648-660.

Keefe JR, McCarthy KS, Dinger U, Zilcha-Mano S, Barber JP. A meta-analytic review of psychodynamic therapies for anxiety disorders. *Clin Psychol Rev.* 2014;34:309-323.

plus: search of reference lists of included studies

plus: search in published and regularly updated list ("Lilliengren-List") of all previously identified RCTs on PDT ([http://w3.psychology.su.se/staff/peli/RCTs\\_of\\_PDT.pdf](http://w3.psychology.su.se/staff/peli/RCTs_of_PDT.pdf))

Searches were updated until December 2016

## eAppendix D: Flow-chart: selection process of studies

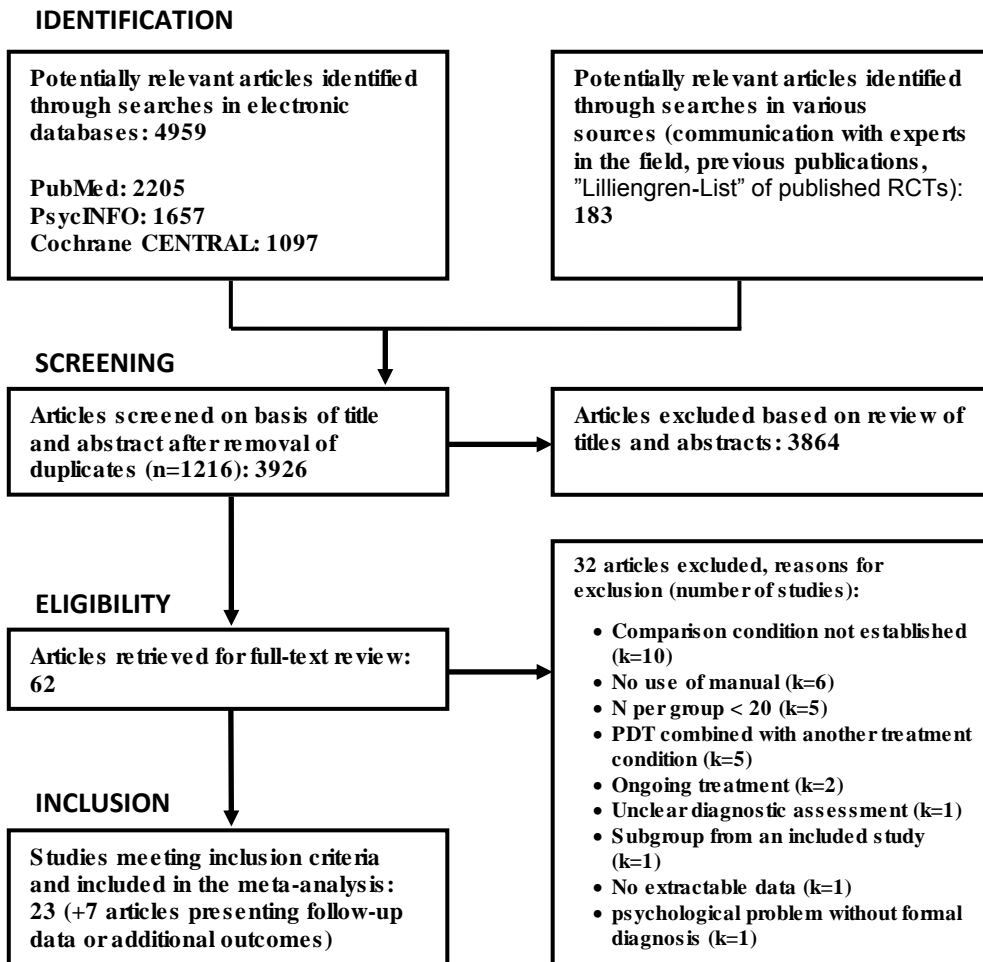

## eAppendix E: Multilevel Allegiance Rating Scale (MARS)

|        |       |
|--------|-------|
| Study: | Date: |
| Rate:  |       |

Please rate allegiance for each treatment condition:

| <b>MULTILEVEL ALLEGIANCE RATING SCALE - MARS</b>                                                                                                                                                                                                                                                                                                                                                                                                                                                                                                                                                                                                                                                                                                       |            |             |
|--------------------------------------------------------------------------------------------------------------------------------------------------------------------------------------------------------------------------------------------------------------------------------------------------------------------------------------------------------------------------------------------------------------------------------------------------------------------------------------------------------------------------------------------------------------------------------------------------------------------------------------------------------------------------------------------------------------------------------------------------------|------------|-------------|
| <b>LEVEL 1) Researcher allegiance</b>                                                                                                                                                                                                                                                                                                                                                                                                                                                                                                                                                                                                                                                                                                                  | <b>PDT</b> | <b>COMP</b> |
| <p><b>1. Author(s) developed treatment (or treatment component)</b></p> <ul style="list-style-type: none"> <li>Code 1 if at least one of the self-quotations is used as support for the treatment description OR the authors explicitly developed the treatment OR have developed a manual for the conduct of the treatment</li> <li>Code 0 if only other researchers are cited or mentioned in the description of the treatment</li> <li>Code unclear (“?”) if no information on the developers of the treatment is available</li> </ul>                                                                                                                                                                                                              |            |             |
| <p><b>2. Author(s) contributed to an etiological understanding of the disorder which matches the treatment</b></p> <ul style="list-style-type: none"> <li>Code 1 if at least one of the passages supported by self-quotations contains a theoretical contribution to an etiological understanding of the disorder based on the same theoretical principles as the treatment OR the authors explicitly state that they have contributed to such an understanding</li> <li>Code 0 if none of the passages supported by self-quotations contains a theoretical contribution to an etiological understanding of the disorder based on the same theoretical principles as the treatment</li> <li>Code unclear (“?”) if none of the above applies</li> </ul> |            |             |
| <p><b>Code 1</b> if at least one of the above items received a 1<br/><b>Code 0</b> in all other cases</p>                                                                                                                                                                                                                                                                                                                                                                                                                                                                                                                                                                                                                                              |            |             |
| <b>LEVEL 2) Therapist allegiance</b>                                                                                                                                                                                                                                                                                                                                                                                                                                                                                                                                                                                                                                                                                                                   | <b>PDT</b> | <b>COMP</b> |
| <p><b>1. Therapists therapeutic orientation matches with treatment</b></p> <ul style="list-style-type: none"> <li>Code 1 if it is explicitly stated that the therapeutic orientation of the therapists matches with the applied therapeutic approach OR the therapists had a preference for the applied treatment OR they were experienced in delivering the applied treatment</li> <li>Code 0 if it is explicitly stated that the therapeutic orientation of the therapists does not match with the therapeutic approach</li> <li>Code unclear (“?”) if no information on the therapists’ therapeutic orientation is given OR therapists have only been trained in the approach</li> </ul>                                                            |            |             |
| <p><b>Code 1</b> if a 1 has been assigned<br/><b>Code 0</b> if a 0 or a “?” has been assigned</p>                                                                                                                                                                                                                                                                                                                                                                                                                                                                                                                                                                                                                                                      |            |             |

| <b>LEVEL 3) Trainer allegiance</b>                                                                                                                                                                                                                                                                                                                                                                                                                                                                                                                                                                                                                                                                                                                                                                                                                                                                                                       | <b>PDT</b> | <b>COMP</b> |
|------------------------------------------------------------------------------------------------------------------------------------------------------------------------------------------------------------------------------------------------------------------------------------------------------------------------------------------------------------------------------------------------------------------------------------------------------------------------------------------------------------------------------------------------------------------------------------------------------------------------------------------------------------------------------------------------------------------------------------------------------------------------------------------------------------------------------------------------------------------------------------------------------------------------------------------|------------|-------------|
| <p><b>1. Author(s) or Expert(s) trained therapists</b></p> <ul style="list-style-type: none"> <li>• Code 1 if one of the authors or an expert other than the author trained therapists in the treatment for which he/she shows an allegiance. Note: author has to be established as an expert. Example: people entitled “treatment experts”, therapists with great experience in the treatment approach; therapists who published about the treatment approach; trainer mentioned with his/her name; “senior advisor”</li> <li>• Code 0 if the therapists were trained by someone else or no training was provided (e.g. therapists were provided treatment manuals for self-training)</li> <li>• Code unclear (“?”) if there is no explicit information on who trained therapists</li> </ul>                                                                                                                                            |            |             |
| <p><b>Code 1</b> if a 1 has been assigned<br/> <b>Code 0</b> if a 0 or a “?” has been assigned</p>                                                                                                                                                                                                                                                                                                                                                                                                                                                                                                                                                                                                                                                                                                                                                                                                                                       |            |             |
| <b>LEVEL 4) Supervisor allegiance</b>                                                                                                                                                                                                                                                                                                                                                                                                                                                                                                                                                                                                                                                                                                                                                                                                                                                                                                    | <b>PDT</b> | <b>COMP</b> |
| <p><b>1. Author(s) or Expert(s) supervised therapists</b></p> <ul style="list-style-type: none"> <li>• Code 1 if one of the authors or an expert other than the author supervised therapists in the treatment for which he/she shows an allegiance. Note: author has to be established as an expert. Example: people entitled “treatment experts”, therapists with great experience in the treatment approach; therapists who published about the treatment approach; supervisor mentioned with his/her name; “senior advisor”</li> <li>• Code 0 if supervision was provided but the people involved are not regarded as experts (e.g. therapists provided supervision to each other or saw other supervisors, without details provided about their experience or proficiency) OR no training or supervision was provided</li> <li>• Code unclear (“?”) if no information is given on who provided supervision for therapists</li> </ul> |            |             |
| <p><b>Code 1</b> if a 1 has been assigned<br/> <b>Code 0</b> if a 0 or a “?” has been assigned</p>                                                                                                                                                                                                                                                                                                                                                                                                                                                                                                                                                                                                                                                                                                                                                                                                                                       |            |             |
| <b>TOTAL SCORE 1-4 (sum)</b>                                                                                                                                                                                                                                                                                                                                                                                                                                                                                                                                                                                                                                                                                                                                                                                                                                                                                                             |            |             |
| <b>ALLEGIANCE: PDT MINUS COMP (max. -4 to 4)</b>                                                                                                                                                                                                                                                                                                                                                                                                                                                                                                                                                                                                                                                                                                                                                                                                                                                                                         |            |             |



## eAppendix F: Assignment of outcome measures to areas of outcome for each study

| <b>Study</b>             | <b>Outcome measure included in meta-analysis<sup>1</sup></b> | <b>Area of outcome the outcome measure was assigned to</b> |
|--------------------------|--------------------------------------------------------------|------------------------------------------------------------|
| Barber, 2012             | HRSD Response                                                | Target symptoms                                            |
| Connolly-Gibbons, 2016   | BASIS-24 means                                               | Target symptoms                                            |
|                          | HAM-D means                                                  | Target symptoms                                            |
|                          | QOLI means                                                   | Psychosocial functioning                                   |
|                          | SF-36 MCS means                                              | Psychosocial functioning                                   |
|                          | SF-36 PCS means                                              | Psychosocial functioning                                   |
| Cooper, 2003             | EPDS means                                                   | Target symptoms                                            |
|                          | SCID Remission                                               | Target symptoms                                            |
| Driessen, 2013           | HAM-D means                                                  | Target symptoms                                            |
|                          | IDS-SR means                                                 | Target symptoms                                            |
| Gallagher-Thompson, 1994 | BDI means                                                    | Target symptoms                                            |
|                          | GDS means                                                    | Target symptoms                                            |
|                          | HRSD means                                                   | Target symptoms                                            |
|                          | SADS Remission                                               | Target symptoms                                            |
| Salminen, 2008           | BDI means                                                    | Target symptoms                                            |
|                          | HRSD Remission/means <sup>2</sup>                            | Target symptoms                                            |
|                          | SCID Remission                                               | Target symptoms                                            |
|                          | SOFAS means                                                  | Psychosocial functioning                                   |
| Shapiro, 1994            | BDI means                                                    | Target symptoms                                            |
|                          | IIP means                                                    | Psychosocial functioning                                   |
|                          | SAS social subscale means                                    | General psychiatric symptoms                               |
|                          | SCL-90 DS means                                              | Target symptoms                                            |
|                          | SCL-90 R GSI means                                           | General psychiatric symptoms                               |
|                          | Self-esteem                                                  | Psychosocial functioning                                   |
| Thompson, 1987           | BDI means                                                    | Target symptoms                                            |
|                          | BPSR means                                                   | General psychiatric symptoms                               |
|                          | BSI Anxiety means                                            | General psychiatric symptoms                               |
|                          | BSI Depression means                                         | Target symptoms                                            |
|                          | BSI Global severity means                                    | General psychiatric symptoms                               |
|                          | GAS means                                                    | Psychosocial functioning                                   |
|                          | GDS means                                                    | Target symptoms                                            |
|                          | HRSD means                                                   | Target symptoms                                            |
|                          | SAS means                                                    | Psychosocial functioning                                   |
|                          | SADS Response                                                | Target symptoms                                            |
| Bögels, 2014             | BAT means                                                    | Target symptoms                                            |
|                          | Psychopathology Composite means                              | General psychiatric symptoms                               |
|                          | SA Composite means                                           | Target symptoms                                            |
|                          | SPAI being in functional range                               | Target symptoms                                            |
|                          | SPDSC means                                                  | Target symptoms                                            |
| Leichsenring, 2013       | BDI means                                                    | General psychiatric symptoms                               |
|                          | IIP means                                                    | Psychosocial functioning                                   |
|                          | LSAS means                                                   | Target symptoms                                            |
|                          | SPAI means                                                   | Target symptoms                                            |
| Leichsenring, 2009       | BAI means                                                    | General psychiatric symptoms                               |
|                          | BDI means                                                    | General psychiatric symptoms                               |
|                          | HADS - anxiety means                                         | General psychiatric symptoms                               |
|                          | HAM-A means                                                  | Target symptoms                                            |
|                          | IIP means                                                    | Psychosocial functioning                                   |
|                          | PSWQ means                                                   | Target symptoms                                            |
|                          | STAI trait means                                             | General psychiatric symptoms                               |
| Leichsenring, 2013       | BDI means                                                    | General psychiatric symptoms                               |
|                          | IIP means                                                    | Psychosocial functioning                                   |
|                          | LSAS means                                                   | Target symptoms                                            |
|                          | SPAI means                                                   | Target symptoms                                            |

|                               |                                      |                              |
|-------------------------------|--------------------------------------|------------------------------|
| Brom, 1989                    | DPQ Conceit means                    | Psychosocial functioning     |
|                               | DPQ Discontentment means             | Psychosocial functioning     |
|                               | DPQ Dominance means                  | Psychosocial functioning     |
|                               | DPQ Inadequacy means                 | Psychosocial functioning     |
|                               | DPQ Rigidity means                   | Psychosocial functioning     |
|                               | DPQ Self-esteem means                | Psychosocial functioning     |
|                               | DPQ Social inadequacy means          | Psychosocial functioning     |
|                               | IES means                            | Target symptoms              |
| Garner, 1993                  | SCL-90 total means                   | General psychiatric symptoms |
|                               | BDI means                            | General psychiatric symptoms |
|                               | Borderline Syndrome Index means      | General psychiatric symptoms |
|                               | Eating Attitudes Test total means    | Target symptoms              |
|                               | EDE Attitudes toward shape means     | Target symptoms              |
|                               | EDE Attitudes toward weight means    | Target symptoms              |
|                               | EDE Binge eating episodes means      | Target symptoms              |
|                               | EDE Dietary Restraint means          | Target symptoms              |
|                               | EDE Vomiting episodes means          | Target symptoms              |
|                               | EDI Body dissatisfaction             | Target symptoms              |
|                               | EDI Bulimia means                    | Target symptoms              |
|                               | EDI Drive for thinness means         | Target symptoms              |
|                               | EDI Ineffectiveness means            | Target symptoms              |
|                               | EDI Interoceptive awareness means    | Target symptoms              |
|                               | EDI Interpersonal distrust means     | Target symptoms              |
|                               | EDI Maturity fears means             | Target symptoms              |
|                               | EDI Perfectionism means              | Target symptoms              |
|                               | MCMII Borderline subscale            | General psychiatric symptoms |
|                               | MCMII Dysthymia subscale             | General psychiatric symptoms |
|                               | Rosenberg Self-esteem means          | Psychosocial functioning     |
| SCL-90-R means                | General psychiatric symptoms         |                              |
| Social Adjustment Scale means | Psychosocial functioning             |                              |
| Poulsen, 2014                 | BDI means                            | General psychiatric symptoms |
|                               | EDE global means                     | Target symptoms              |
|                               | IIP total means                      | Psychosocial functioning     |
|                               | No bingeing or purging, last 28 days | Target symptoms              |
|                               | SCL-90-R means                       | General psychiatric symptoms |
|                               | STAI-S means                         | General psychiatric symptoms |
|                               | STAI-T means                         | General psychiatric symptoms |
| Tasca, 2006                   | BMI means                            | Target symptoms              |
|                               | CES-Depression means                 | General psychiatric symptoms |
|                               | Days binged means                    | Target symptoms              |
|                               | IIP total means                      | Psychosocial functioning     |
|                               | Rosenberg Self-esteem means          | Psychosocial functioning     |
|                               | TFEQ-Hunger means                    | Target symptoms              |
| Zipfel, 2015                  | TFEQ-Restraint means                 | Target symptoms              |
|                               | BMI means                            | Target symptoms              |
|                               | EDI total score means                | Target symptoms              |
|                               | Recovery (PSR & BMI)                 | Target symptoms              |
| Crits-Christoph, 1999         | SIAB-EX means                        | Target symptoms              |
|                               | BAI means                            | General psychiatric symptoms |
|                               | BDI means                            | General psychiatric symptoms |
|                               | BSI GSI means                        | General psychiatric symptoms |
|                               | Drug composite means                 | Target symptoms              |
|                               | Family composite means               | Psychosocial functioning     |
|                               | HRSD means                           | General psychiatric symptoms |
|                               | IIP means                            | Psychosocial functioning     |
|                               | Legal composite means                | Psychosocial functioning     |
|                               | Psychiatric composite means          | General psychiatric symptoms |

|                               |                                            |                              |
|-------------------------------|--------------------------------------------|------------------------------|
| Woody, 1983                   | Alcohol use factor score means             | General psychiatric symptoms |
|                               | BDI means                                  | General psychiatric symptoms |
|                               | Drug factor means                          | Target symptoms              |
|                               | Employment factor means                    | Psychosocial functioning     |
|                               | GAS score (SADS-C) means                   | Psychosocial functioning     |
|                               | Legal factor means                         | Psychosocial functioning     |
|                               | Maudsley N score means                     | Psychosocial functioning     |
|                               | Medical factor score means                 | General psychiatric symptoms |
|                               | Psychiatric factor score means             | General psychiatric symptoms |
|                               | Psychotherapy factor means                 | General psychiatric symptoms |
|                               | SADS anxiety means                         | General psychiatric symptoms |
|                               | SADS depression means                      | General psychiatric symptoms |
|                               | SCL-90 means                               | General psychiatric symptoms |
| Clarkin, 2007                 | Attachment security - classified as secure | Psychosocial functioning     |
|                               | AIAQ Anger means                           | Target symptoms              |
|                               | AIAQ Direct Assault means                  | Target symptoms              |
|                               | AIAQ Irritability means                    | Target symptoms              |
|                               | AIAQ Verbal assault means                  | Target symptoms              |
|                               | BDI means                                  | General psychiatric symptoms |
|                               | BSI Anxiety means                          | General psychiatric symptoms |
|                               | Coherence means                            | Psychosocial functioning     |
|                               | GAF means                                  | Psychosocial functioning     |
|                               | Impulsivity Barrett F1 means               | Target symptoms              |
|                               | Impulsivity Barrett F2 means               | Target symptoms              |
|                               | Impulsivity Barrett F3 means               | Target symptoms              |
|                               | OAS Suicidality means                      | Target symptoms              |
|                               | Reflective functioning means               | Psychosocial functioning     |
|                               | Resolution of loss means                   | Psychosocial functioning     |
| Resolution of trauma means    | Psychosocial functioning                   |                              |
| Social adjustment scale means | Psychosocial functioning                   |                              |
| Emmelkamp, 2006               | Avoidance scale means                      | Target symptoms              |
|                               | LWASQ means                                | General psychiatric symptoms |
|                               | PDBQ avoidant means                        | Target symptoms              |
|                               | PDBQ dependent means                       | Psychosocial functioning     |
|                               | PDBQ obsessive means                       | Psychosocial functioning     |
|                               | SPAI social phobia means                   | Target symptoms              |
| Muran, 2005                   | IIP means                                  | Psychosocial functioning     |
|                               | SCL-90 GSI means                           | General psychiatric symptoms |
|                               | Target complaints means                    | Target symptoms              |
|                               | WISPI means                                | Target symptoms              |
| Svartberg, 2004               | IIP means                                  | Psychosocial functioning     |
|                               | MCMII means                                | Target symptoms              |
|                               | SCL-90-R GSI means                         | General psychiatric symptoms |

<sup>1</sup>For more details on outcome instruments, readers are referred to the individual studies (eAppendix B) <sup>2</sup>HRSD remission was used at posttreatment, HRSD means was used at follow-up
